# Supplementary material for: Serum NY-ESO-1 antibody as a predictive biomarker for postoperative recurrence of gastric cancer: a multicenter prospective observational study
Source: Springer Nature journal article supplement (doi:10.1038/s41416-023-02540-3), 2024-02-07
Supplement: MOESM1 [file 41416_2023_2540_MOESM1_ESM.pdf]

**Supplementary Table 1.** Patient characteristics based on serum NY-ESO-1 antibody status at 12 months after surgery.

|                                |                     | NY-ESO-1 Antibody<br>(-)<br>(n=37) | NY-ESO-1 Antibody<br>(+)<br>(n=32) | P value |
|--------------------------------|---------------------|------------------------------------|------------------------------------|---------|
| Age                            | years (range)       | 73 (41-86)                         | 72.5 (61-82)                       | 0.49    |
| Sex                            | Male                | 32 (86.5%)                         | 27 (84.4%)                         | 0.80    |
|                                | Female              | 5 (13.5%)                          | 5 (15.6%)                          |         |
| cT                             | 3                   | 19 (51.4%)                         | 20 (62.5%)                         | 0.35    |
|                                | 4                   | 18 (48.6%)                         | 12 (37.5%)                         |         |
| cN                             | 0                   | 9 (24.3%)                          | 3 (9.4%)                           | 0.26    |
|                                | 1                   | 13 (35.1%)                         | 15 (46.9%)                         |         |
|                                | 2                   | 9 (24.3%)                          | 11 (34.4%)                         |         |
|                                | 3                   | 6 (16.2%)                          | 3 (9.4%)                           |         |
| cStage                         | II                  | 18 (48.6%)                         | 10 (31.3%)                         | 0.22    |
|                                | III                 | 19 (51.4%)                         | 21 (65.6%)                         |         |
|                                | IV                  | 0 (0%)                             | 1 (3.1%)                           |         |
| Tumor location                 | Lower               | 13 (35.1%)                         | 5 (15.6%)                          | 0.18    |
|                                | Middle              | 10 (27.0%)                         | 12 (37.5%)                         |         |
|                                | Upper               | 14 (37.8%)                         | 15 (46.9%)                         |         |
| Histological type <sup>a</sup> | Differentiated      | 25 (67.6%)                         | 24 (75.0%)                         | 0.39    |
|                                | Undifferentiated    | 10 (27.0%)                         | 8 (25.0%)                          |         |
|                                | Others              | 2 (5.4%)                           | 0 (0%)                             |         |
| Neoadjuvant chemotherapy       | Yes                 | 2 (5.4%)                           | 5 (15.6%)                          | 0.16    |
|                                | No                  | 35 (94.6%)                         | 27 (84.4%)                         |         |
| Surgical procedure             | Total gastrectomy   | 15 (40.5%)                         | 16 (50.0%)                         | 0.43    |
|                                | Partial gastrectomy | 22 (59.5%)                         | 16 (50.0%)                         |         |
| pT <sup>b</sup>                | 0                   | 0 (0%)                             | 1 (3.1%)                           | 0.37    |
|                                | 1                   | 4 (10.8%)                          | 1 (3.1%)                           |         |
|                                | 2                   | 11 (29.7%)                         | 6 (18.8%)                          |         |
|                                | 3                   | 14 (37.8%)                         | 17 (53.1%)                         |         |
|                                | 4                   | 8 (21.6%)                          | 7 (21.9%)                          |         |
| pN <sup>b</sup>                | 0                   | 12 (32.4%)                         | 2 (6.3%)                           | 0.001   |
|                                | 1                   | 14 (37.8%)                         | 5 (15.6%)                          |         |
|                                | 2                   | 4 (10.8%)                          | 6 (18.8%)                          |         |
|                                | 3                   | 7 (18.9%)                          | 19 (59.4%)                         |         |
| pStage <sup>b</sup>            | 0                   | 0 (0%)                             | 1 (3.1%)                           | 0.003   |
|                                | I                   | 8 (21.6%)                          | 0 (0%)                             |         |
|                                | II                  | 17 (45.9%)                         | 9 (28.1%)                          |         |
|                                | III                 | 11 (29.7%)                         | 22 (68.8%)                         |         |
|                                | IV                  | 1 (2.7%)                           | 0 (0%)                             |         |
| Adjuvant chemotherapy          | No                  | 15 (40.5%)                         | 6 (18.8%)                          | 0.050   |
|                                | Yes                 | 22 (59.5%)                         | 26 (81.3%)                         |         |

Data are shown as the number of patients (%) or the median (min-max). The TNM stage was classified according to the 14th edition of the Japanese Classification of Gastric Carcinoma.<sup>26</sup> <sup>a</sup> Differentiated: pap/tub1/tub2, Undifferentiated: por/sig, Others: muc/NEC/carcinoma with lymphoid stroma/hepatoid adenocarcinoma/undifferentiated carcinoma. <sup>b</sup> Pathological data are shown only for dissected patients.

**Supplementary Table 2.** Patient characteristics based on serum p53 antibody status at 12 months after surgery.

|                                |                     | p53 Antibody<br>(-)<br>(n=17) | p53 Antibody<br>(+)<br>(n=59) | <i>P</i> value |
|--------------------------------|---------------------|-------------------------------|-------------------------------|----------------|
| Age                            | years (range)       | 73 (49-84)                    | 68 (40-88)                    | 0.16           |
| Sex                            | Male                | 13 (76.5%)                    | 47 (79.7%)                    | 0.78           |
|                                | Female              | 4 (23.5%)                     | 12 (20.3%)                    |                |
| cT                             | 3                   | 7 (41.2%)                     | 33 (55.9%)                    | 0.28           |
|                                | 4                   | 10 (58.8%)                    | 26 (44.1%)                    |                |
| cN                             | 0                   | 4 (23.5%)                     | 26 (44.1%)                    | 0.36           |
|                                | 1                   | 5 (29.4%)                     | 17 (28.8%)                    |                |
|                                | 2                   | 6 (35.3%)                     | 11 (18.6%)                    |                |
|                                | 3                   | 2 (11.8%)                     | 5 (8.5%)                      |                |
| cStage                         | II                  | 7 (41.2%)                     | 35 (59.3%)                    | 0.36           |
|                                | III                 | 9 (52.9%)                     | 20 (33.9%)                    |                |
|                                | IV                  | 1 (5.9%)                      | 4 (6.8%)                      |                |
|                                |                     |                               |                               |                |
| Tumor location                 | Lower               | 8 (47.1%)                     | 20 (33.9%)                    | 0.61           |
|                                | Middle              | 5 (29.4%)                     | 22 (37.3%)                    |                |
|                                | Upper               | 4 (23.5%)                     | 17 (28.8%)                    |                |
| Histological type <sup>a</sup> | Differentiated      | 9 (52.9%)                     | 32 (54.2%)                    | 0.16           |
|                                | Undifferentiated    | 6 (35.3%)                     | 26 (44.1%)                    |                |
|                                | Others              | 2 (11.8%)                     | 1 (1.7%)                      |                |
| Neoadjuvant chemotherapy       | Yes                 | 3 (17.6%)                     | 11 (18.6%)                    | 0.93           |
|                                | No                  | 14 (82.4%)                    | 48 (81.4%)                    |                |
| Surgical procedure             | Total gastrectomy   | 5 (29.4%)                     | 20 (33.9%)                    | 0.73           |
|                                | Partial gastrectomy | 12 (70.6%)                    | 39 (66.1%)                    |                |
| pT <sup>b</sup>                | 1                   | 2 (11.8%)                     | 4 (6.8%)                      | 0.79           |
|                                | 2                   | 4 (23.5%)                     | 15 (25.4%)                    |                |
|                                | 3                   | 8 (47.1%)                     | 24 (40.7%)                    |                |
|                                | 4                   | 3 (17.6%)                     | 16 (27.1%)                    |                |
| pN <sup>b</sup>                | 0                   | 6 (35.3%)                     | 23 (39.0%)                    | 0.31           |
|                                | 1                   | 6 (35.3%)                     | 9 (15.3%)                     |                |
|                                | 2                   | 2 (11.8%)                     | 12 (20.3%)                    |                |
|                                | 3                   | 3 (17.6%)                     | 15 (25.4%)                    |                |
| pStage <sup>b</sup>            | I                   | 4 (23.5%)                     | 8 (13.6%)                     | 0.17           |
|                                | II                  | 7 (41.2%)                     | 25 (42.4%)                    |                |
|                                | III                 | 5 (29.4%)                     | 26 (44.1%)                    |                |
|                                | IV                  | 1 (5.9%)                      | 0 (0%)                        |                |
| Adjuvant chemotherapy          | No                  | 10 (58.8%)                    | 15 (25.4%)                    | 0.010          |
|                                | Yes                 | 7 (41.2%)                     | 44 (74.6%)                    |                |

Data are shown as the number of patients (%) or the median (min-max). The TNM stage was classified according to the 14th edition of the Japanese Classification of Gastric Carcinoma.<sup>26</sup> <sup>a</sup> Differentiated: pap/tub1/tub2, Undifferentiated: por/sig, Others: muc/NEC/carcinoma with lymphoid stroma/hepatoid adenocarcinoma/undifferentiated carcinoma. <sup>b</sup> Pathological data are shown only for dissected patients.

**Supplementary Table 3.** Univariate and multivariate analyses of recurrence-free interval in 60 patients whose NY-ESO-1 antibody responses were evaluated at 3 months

|                                                                 | Univariate analysis<br>HR (95% CI) | <i>P</i> value | Multivariate analysis<br>HR (95% CI) | <i>P</i> value |
|-----------------------------------------------------------------|------------------------------------|----------------|--------------------------------------|----------------|
| Age (Years) ( $\geq 70$ vs. $< 70$ )                            | 1.12 (0.48-2.61)                   | 0.80           |                                      |                |
| Sex (Female vs. Male)                                           | 0.73 (0.22-2.46)                   | 0.61           |                                      |                |
| Tumor location<br>(Lower, Middle vs. Upper)                     | 0.89 (0.81-0.98)                   | 0.02           | 0.96 (0.85-1.09)                     | 0.54           |
| Histology (Differentiated vs. Other)                            | 0.82 (0.33-2.00)                   | 0.66           |                                      |                |
| Neoadjuvant chemotherapy<br>(Yes vs. No)                        | 1.37 (0.40-4.62)                   | 0.61           |                                      |                |
| Procedure<br>(Total vs. Partial gastrectomy)                    | 2.99 (1.25-7.15)                   | 0.01           | 2.77 (0.85-9.08)                     | 0.09           |
| pT (3, 4 vs. 0, 1, 2)                                           | 1.07 (1.01-1.13)                   | 0.01           | 1.07 (1.01-1.13)                     | 0.03           |
| pN (2, 3 vs. 0, 1)                                              | 1.12 (1.03-1.22)                   | 0.003          | 1.08 (0.99-1.18)                     | 0.07           |
| pStage (III, IV vs. 0, I, II)                                   | 1.02 (1.01-1.03)                   | 0.001          |                                      |                |
| NY-ESO-1 antibody status at 3 months<br>(Positive vs. Negative) | 5.97 (1.39-25.6)                   | 0.006          | 5.31 (1.19-23.7)                     | 0.03           |

HR, hazard ratio; CI, confidence interval

Variables with  $p < 0.05$  in univariate analysis were assessed in multivariate analysis.

**Supplementary Table 4.** Univariate and multivariate analyses of recurrence-free interval in 76 patients whose p53 antibody responses were evaluated at 12 months

|                                                             | Univariate analysis<br>HR (95% CI) | <i>P</i> value | Multivariate analysis<br>HR (95% CI) | <i>P</i> value |
|-------------------------------------------------------------|------------------------------------|----------------|--------------------------------------|----------------|
| Age (Years) ( $\geq 70$ vs. $< 70$ )                        | 0.37 (0.16-0.91)                   | 0.02           | 0.44 (0.18-1.07)                     | 0.07           |
| Sex (Female vs. Male)                                       | 0.73 (0.25-2.15)                   | 0.57           |                                      |                |
| Tumor location<br>(Lower, Middle vs. Upper)                 | 0.94 (0.86-1.03)                   | 0.17           |                                      |                |
| Histology (Differentiated vs. Other)                        | 0.85 (0.38-1.89)                   | 0.68           |                                      |                |
| Neoadjuvant chemotherapy<br>(Yes vs. No)                    | 1.82 (0.72-4.62)                   | 0.20           |                                      |                |
| Procedure<br>(Total vs. Partial gastrectomy)                | 2.35 (1.06-5.24)                   | 0.03           | 2.40 (1.06-5.43)                     | 0.04           |
| pT (3, 4 vs. 0, 1, 2)                                       | 1.02 (0.98-1.07)                   | 0.27           |                                      |                |
| pN (2, 3 vs. 0, 1)                                          | 1.03 (0.97-1.10)                   | 0.30           |                                      |                |
| pStage (III, IV vs. 0, I, II)                               | 1.01 (1.00-1.02)                   | 0.04           | 1.01 (1.00-1.02)                     | 0.17           |
| p53 antibody status at 12 months<br>(Positive vs. Negative) | 4.28 (0.98-18.6)                   | 0.04           | 4.27 (0.96-18.9)                     | 0.06           |

HR, hazard ratio; CI, confidence interval

Variables with  $p < 0.05$  in univariate analysis were assessed in multivariate analysis.

**Supplementary Table 5.** Univariate and multivariate analyses of recurrence-free interval in 78 patients whose p53 antibody responses were evaluated at 3 months

|                                                             | Univariate analysis<br>HR (95% CI) | <i>P</i> value | Multivariate analysis<br>HR (95% CI) | <i>P</i> value |
|-------------------------------------------------------------|------------------------------------|----------------|--------------------------------------|----------------|
| Age (Years) ( $\geq 70$ vs. $< 70$ )                        | 0.59 (0.29-1.18)                   | 0.13           |                                      |                |
| Sex (Female vs. Male)                                       | 0.52 (0.20-1.34)                   | 0.17           |                                      |                |
| Tumor location<br>(Lower, Middle vs. Upper)                 | 0.94 (0.87-1.02)                   | 0.10           |                                      |                |
| Histology (Differentiated vs. Other)                        | 0.96 (0.48-1.91)                   | 0.90           |                                      |                |
| Neoadjuvant chemotherapy<br>(Yes vs. No)                    | 1.66 (0.75-3.70)                   | 0.21           |                                      |                |
| Procedure<br>(Total vs. Partial gastrectomy)                | 2.05 (1.03-4.09)                   | 0.04           | 1.84 (0.92-3.71)                     | 0.09           |
| pT (3, 4 vs. 0, 1, 2)                                       | 1.03 (0.99-1.07)                   | 0.14           |                                      |                |
| pN (2, 3 vs. 0, 1)                                          | 1.04 (0.99-1.09)                   | 0.16           |                                      |                |
| pStage (III, IV vs. 0, I, II)                               | 1.01 (1.00-1.02)                   | 0.02           | 1.01 (1.00-1.02)                     | 0.049          |
| p53 antibody status at 12 months<br>(Positive vs. Negative) | 0.65 (0.27-1.57)                   | 0.33           |                                      |                |

HR, hazard ratio; CI, confidence interval

Variables with  $p < 0.05$  in univariate analysis were assessed in multivariate analysis.

## Supplementary Figure 1.

Recurrence rates based on the preoperative evaluation of serum NY-ESO-1 or p53 antibody responses in patients with curative resection.

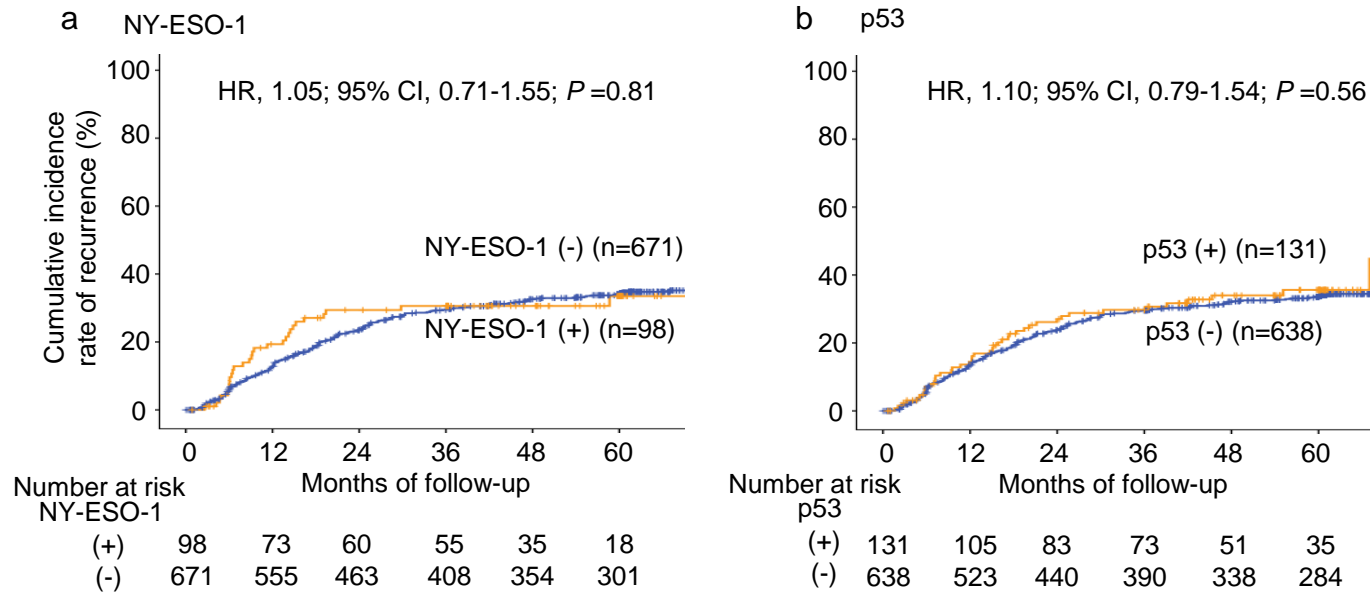

Kaplan-Meier analysis of cumulative recurrence rates was assessed based on the preoperative NY-ESO-1 and p53 antibody status (a and b). HRs and 95% CIs were calculated using the Cox proportional hazard model. P values were calculated using the two-sided log-rank test.

## Supplementary Figure 2.

Longitudinal changes in serum CEA levels in patients with positive preoperative CEA.

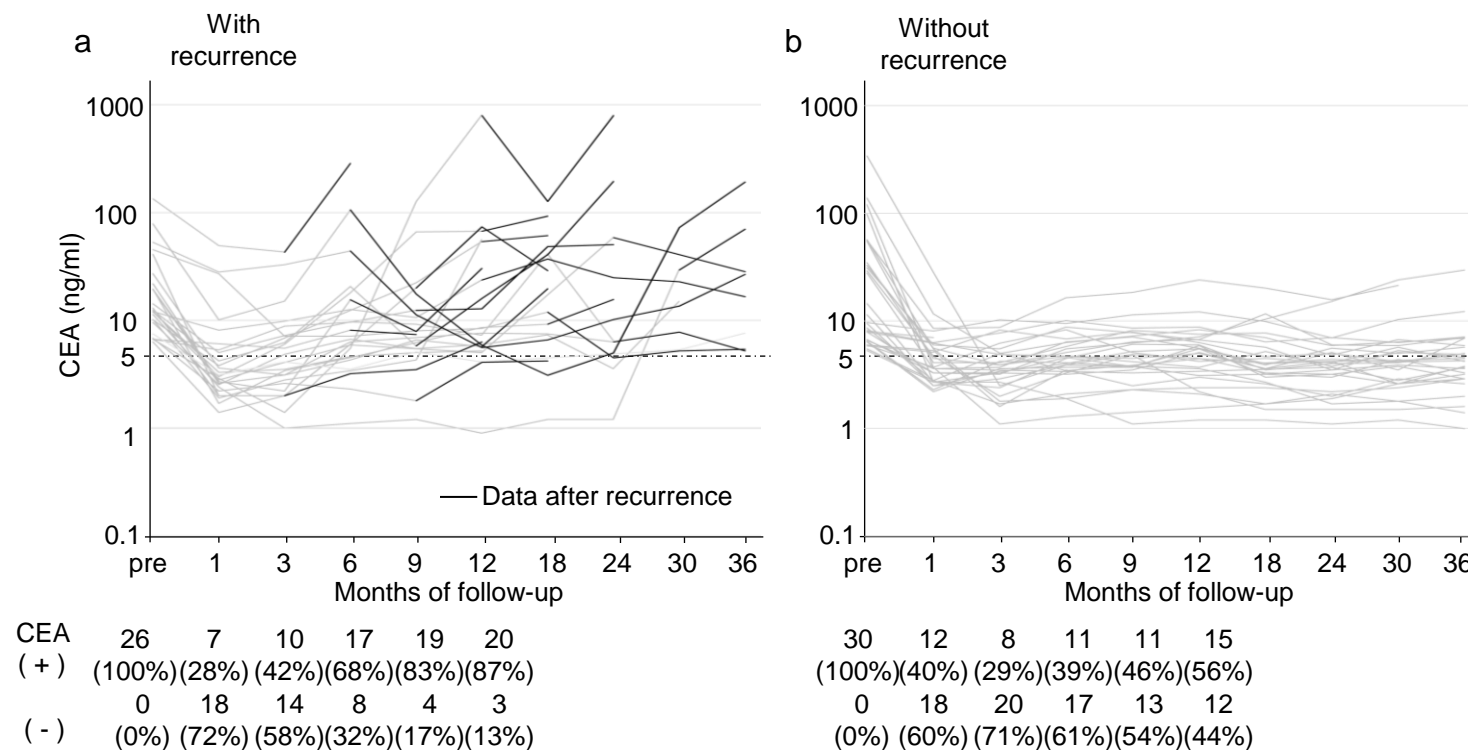

(a) Patients with recurrence (n=26) and (b) patients without recurrence (n=38). Gray and black lines indicate the data before and after recurrence, respectively. The cut-off value of CEA was 5 ng/ml.

### Supplementary Figure 3.

Longitudinal changes in serum CA19-9 levels in patients with positive preoperative CA19-9.

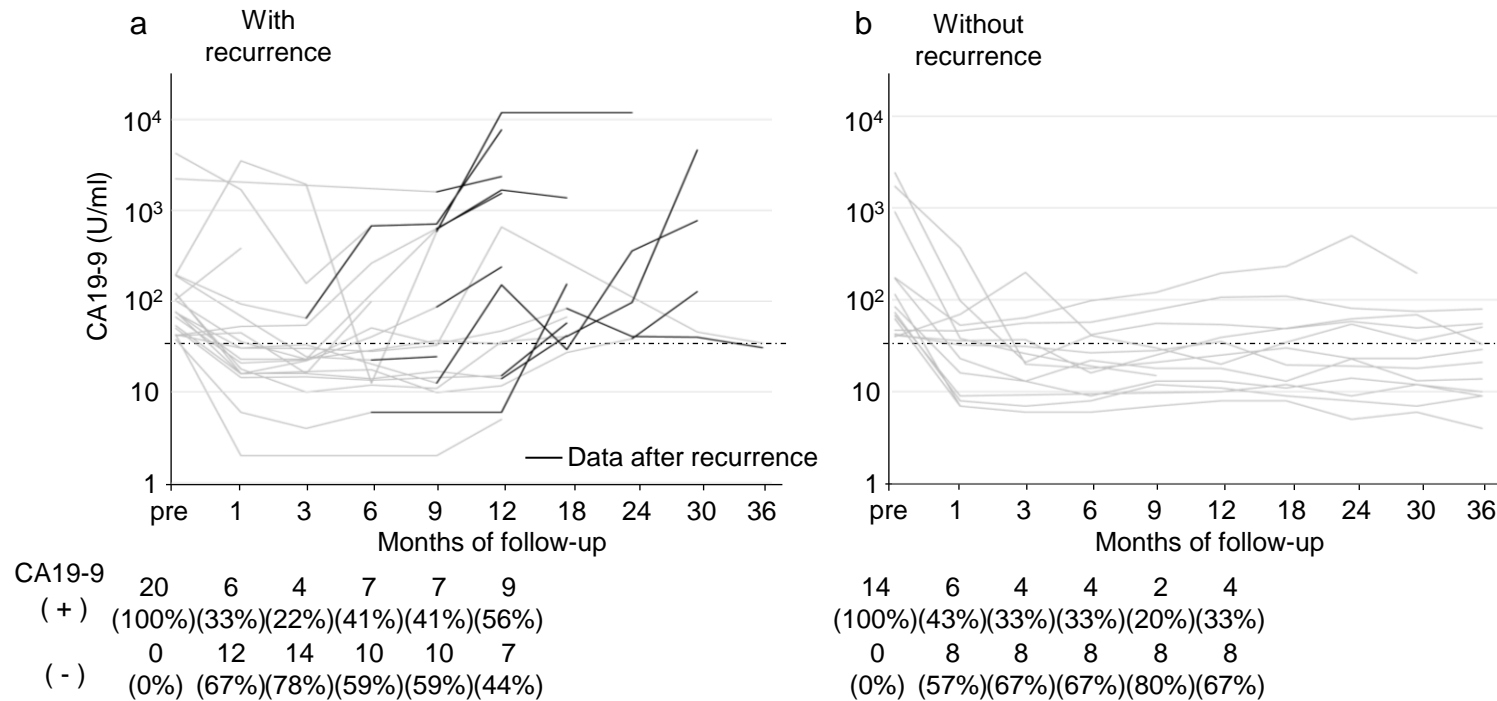

(a) Patients with recurrence (n=20) and (b) patients without recurrence (n=19). Gray and black lines indicate the data before and after recurrence, respectively. The cut-off value of CA19-9 was 37 U/ml.



## Supplementary Figure 4.

Recurrence rates based on the postoperative evaluation of CEA and CA19-9.

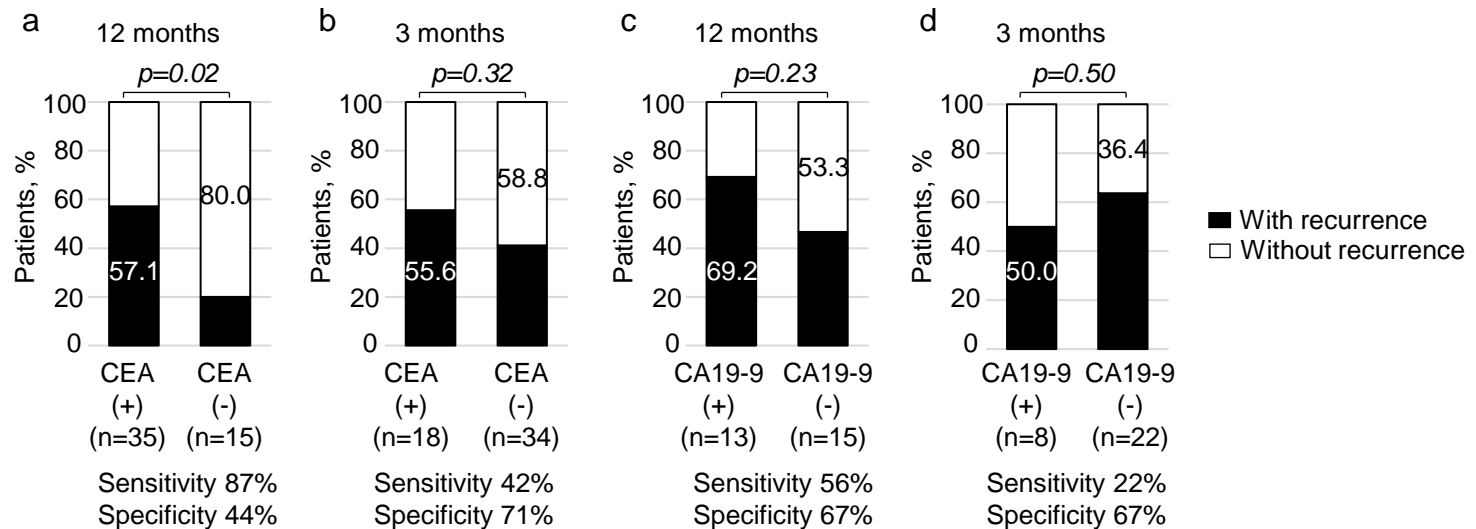

Percentages of patients with or without recurrence according to CEA status at 12 months (a) and 3 months (b), and CA19-9 status at 12 months (c) and 3 months (d) after surgery. *P* values were calculated using a two-sided chi-squared test comparing the distribution of factors between the two columns (positive vs negative). The sensitivity and specificity for postoperative recurrence assessed by CEA or CA19-9 positivity are shown below the graph.

Supplementary Figure 5.

Recurrence rates based on the preoperative evaluation of serum NY-ESO-1 responses and adjuvant chemotherapy.

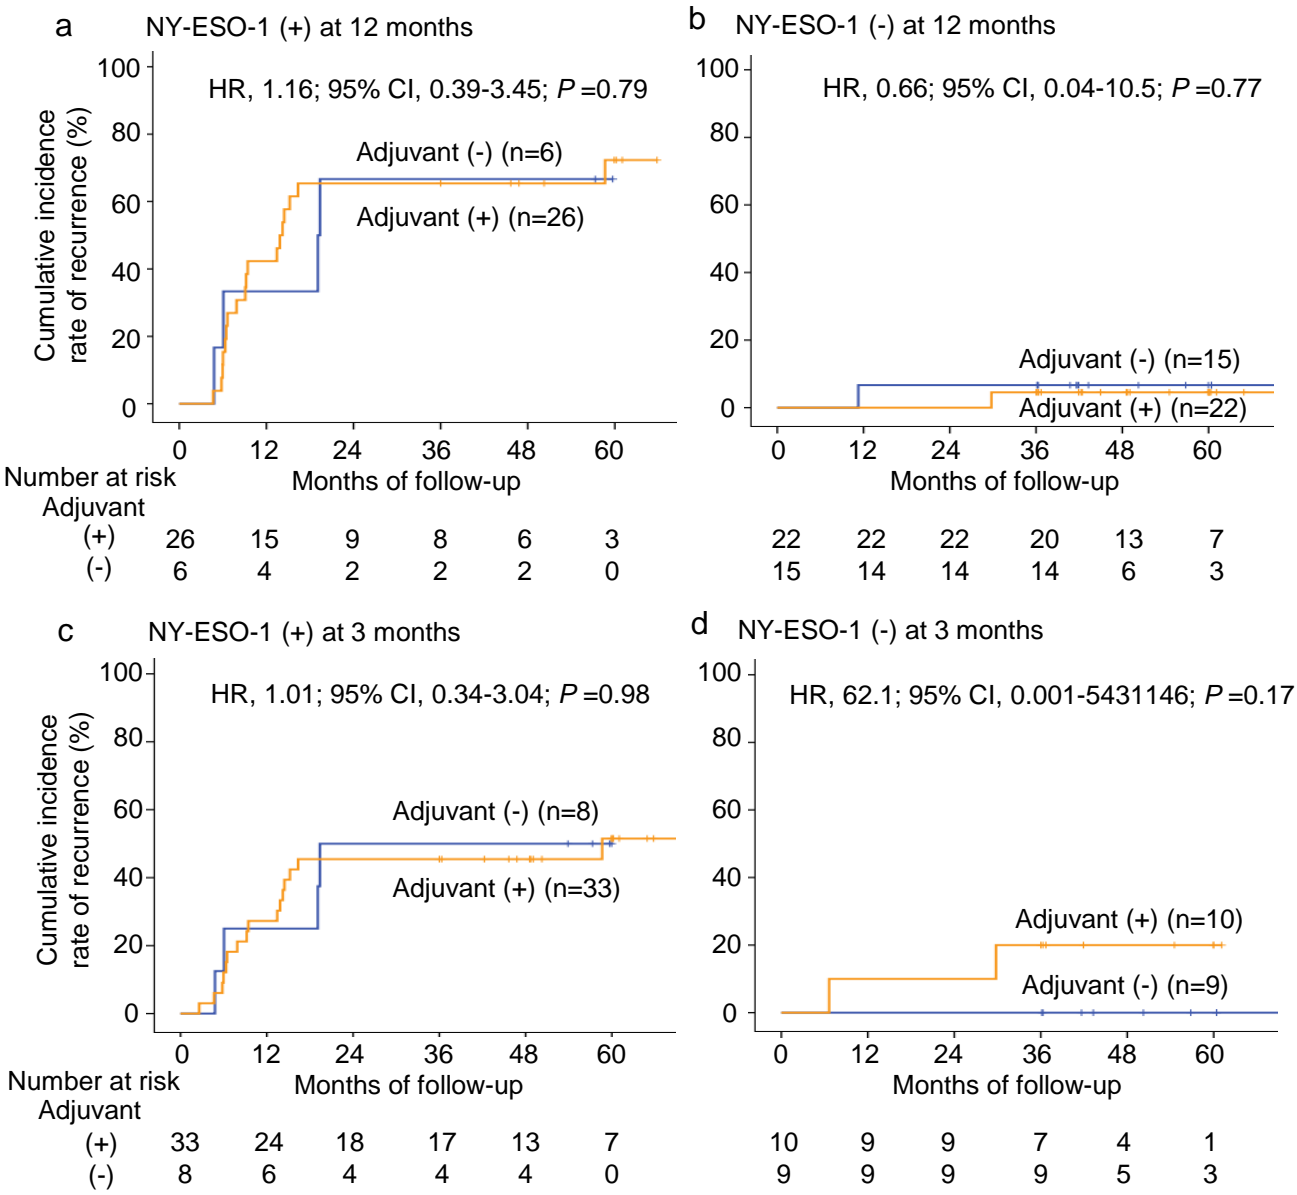

Kaplan-Meier analysis of cumulative recurrence rates was assessed by the administration of adjuvant chemotherapy according to the status of NY-ESO-1 antibody response at 12 months (a and b), and 3 months (c and d). HRs and 95% CIs were calculated using the Cox proportional hazard model. P values were calculated using the two-sided log-rank test.

**Supplementary Figure 6.**

Recurrence rates based on the preoperative evaluation of serum p53 responses and adjuvant chemotherapy.

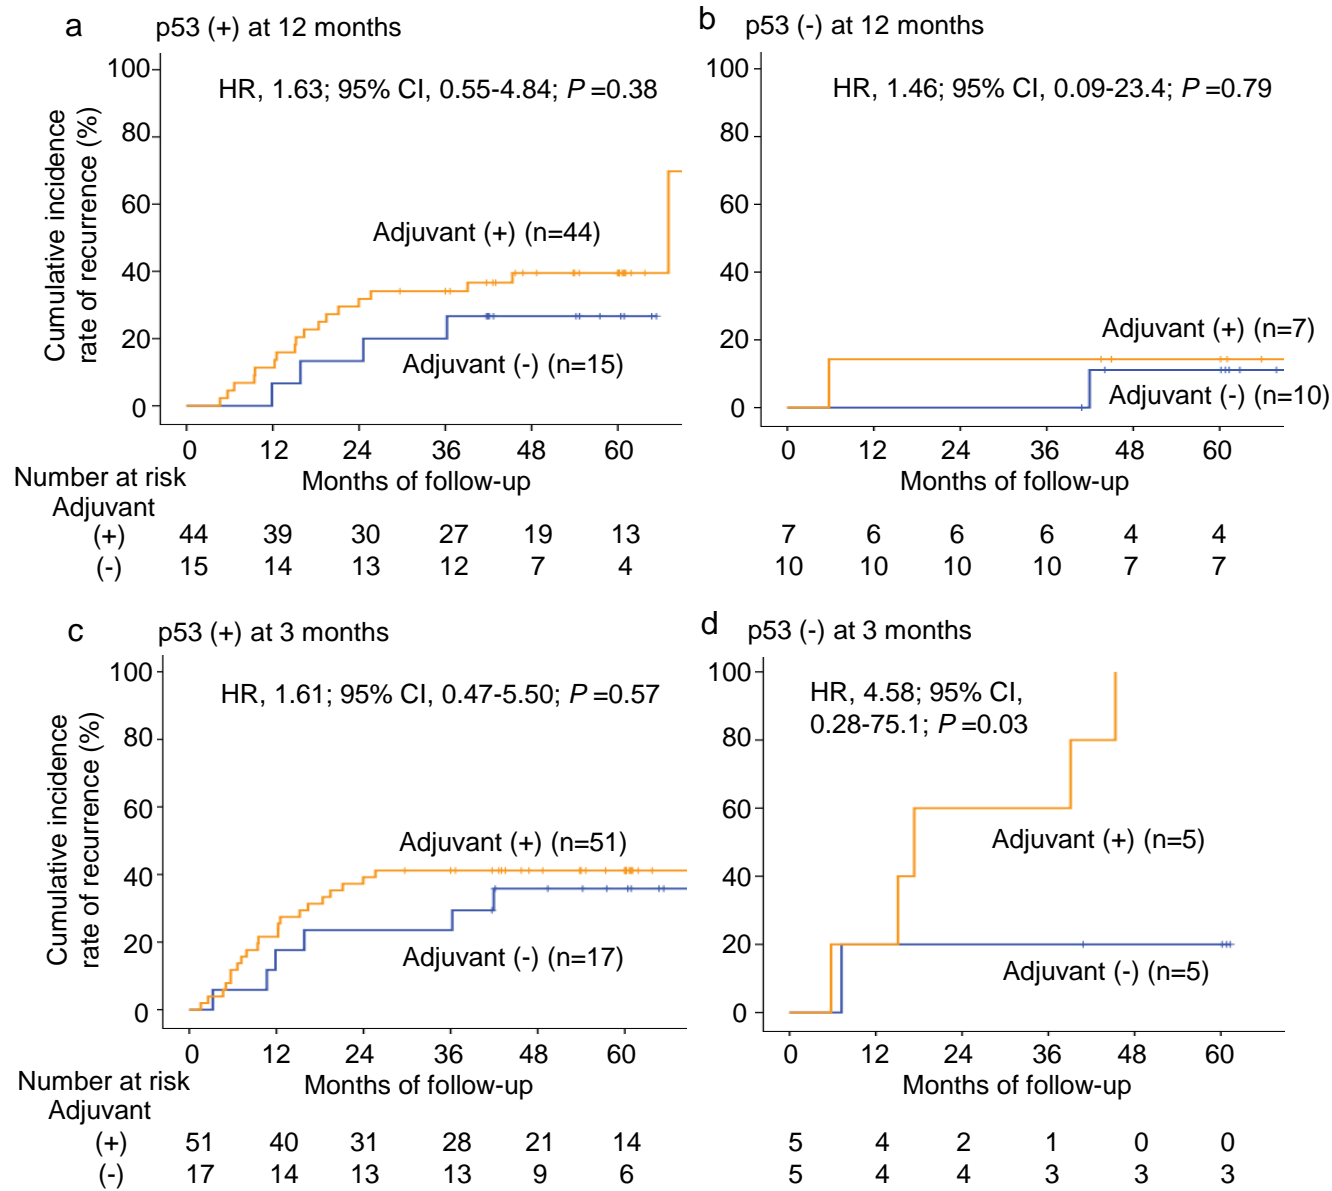

Kaplan-Meier analysis of cumulative recurrence rates was assessed by the administration of adjuvant chemotherapy according to the status of p53 antibody response at 12 months (a and b), and 3 months (c and d). HRs and 95% CIs were calculated using the Cox proportional hazard model. P values were calculated using the two-sided log-rank test.
